# Supplementary material for: Circulating Pro-Vascular Progenitor Cell Depletion During Type 2 Diabetes: Translational Insights Into the Prevention of Ischemic Complications in Diabetes
Source: PubMed Central journal article supplement — JACC Basic Transl Sci. 2018 Nov 5;4(1):98–112. doi: 10.1016/j.jacbts.2018.10.005 (PMC6390504; doi:10.1016/j.jacbts.2018.10.005), 2018-11-05
Supplement: mmc1.pdf [file mmc1.pdf]

**Supplemental Table 1: Summary of antibodies used for flow cytometry analyses.**

|                                     | Marker | Company        |
|-------------------------------------|--------|----------------|
| Hematopoietic                       | CD45   | BioLegend      |
|                                     | CXCR4  | BioLegend      |
|                                     | CD33   | BioLegend      |
|                                     | CD34   | BioLegend      |
| Endothelial                         | CD31   | BioLegend      |
|                                     | CD144  | BD Biosciences |
|                                     | CD146  | BioLegend      |
|                                     | CD133  | Miltenyi       |
| Monocyte /<br>M1 vs M2<br>Phenotype | CD14   | BioLegend      |
|                                     | CD68   | BD Biosciences |
|                                     | CD80   | BioLegend      |
|                                     | CD163  | BioLegend      |
| Granulocyte                         | CD15   | BD Biosciences |
|                                     | CD16b  | BD Biosciences |
|                                     | CD66b  | BD Biosciences |

**Supplemental Table 2: Circulating ALDH<sup>hi</sup>SSC<sup>low</sup> cells progenitor cells expressing the endothelial cell / pericyte marker CD146 were decreased in patients with T2D.**

|                      | Marker       | Control<br>Mean ± SEM | T2D<br>Mean ± SEM | P-Value      |
|----------------------|--------------|-----------------------|-------------------|--------------|
| <b>Hematopoietic</b> | CXCR4        | 70.2 ± 2.2            | 69.1 ± 2.5        | 0.73         |
|                      | CD33         | 85.3 ± 1.9            | 82.8 ± 2.0        | 0.36         |
|                      | CD34         | 75.1 ± 2.7            | 75.9 ± 3.7        | 0.86         |
| <b>Endothelial</b>   | CD31         | 97.2 ± 0.7            | 96.9 ± 0.8        | 0.77         |
|                      | CD144        | 47.6 ± 3.9            | 39.5 ± 3.6        | 0.13         |
|                      | <b>CD146</b> | <b>22.4 ± 2.1</b>     | <b>15.2 ± 2.1</b> | <b>0.01*</b> |
|                      | CD133        | 52.6 ± 3.2            | 53.0 ± 3.5        | 0.93         |

Frequency of circulating ALDH<sup>hi</sup>SSC<sup>low</sup> progenitor cells expressing single hematopoietic cell surface markers demonstrated no significant difference between patients with T2D and age- and gender-matched controls. The frequency of cells expressing CD146, an adhesion molecule expressed on endothelial cells and vessel-wrapping pericytes, was decreased in patients with T2D compared to controls. Data are presented as mean ± SEM (\*p<0.05 by Students t test).

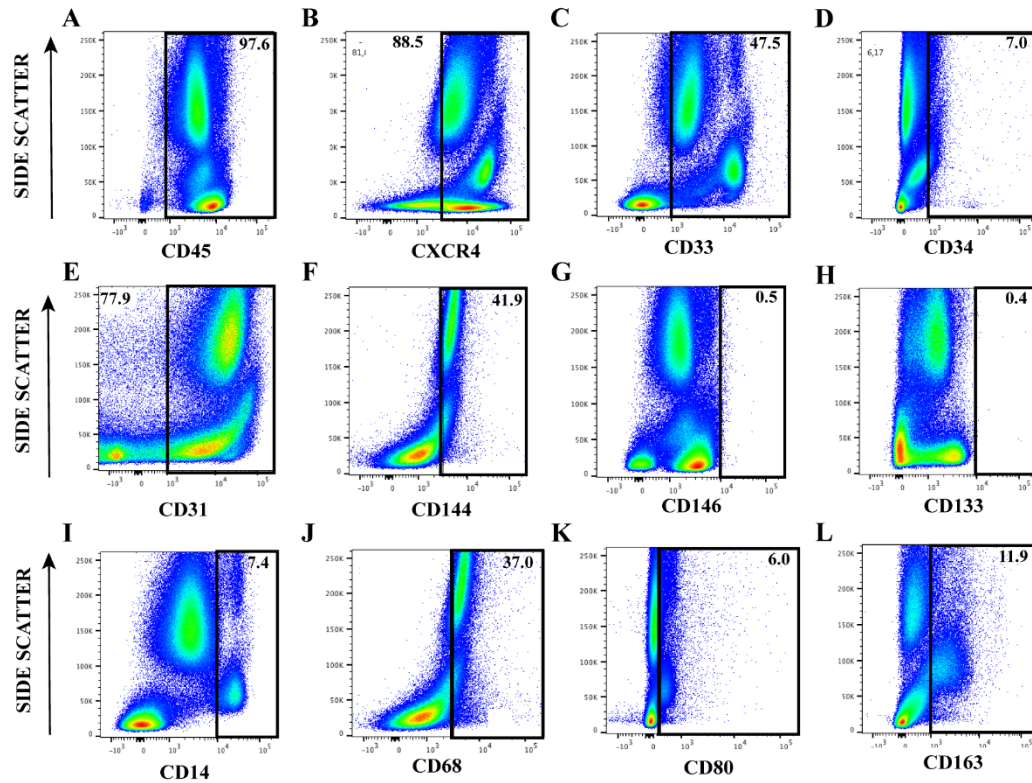

**Supplemental Figure 1. Analyses of circulating cells expressing hematopoietic, endothelial, and macrophage associated surface markers.** Representative flow cytometry plots of peripheral blood mononuclear cells from individuals with T2D assessing the frequency of cells expressing (A-D) hematopoietic, (E-H) endothelial cell surface markers, and (I-L) macrophage cell surface markers. Gates were established by fluorescence minus one (FMO) controls for each fluorochrome.

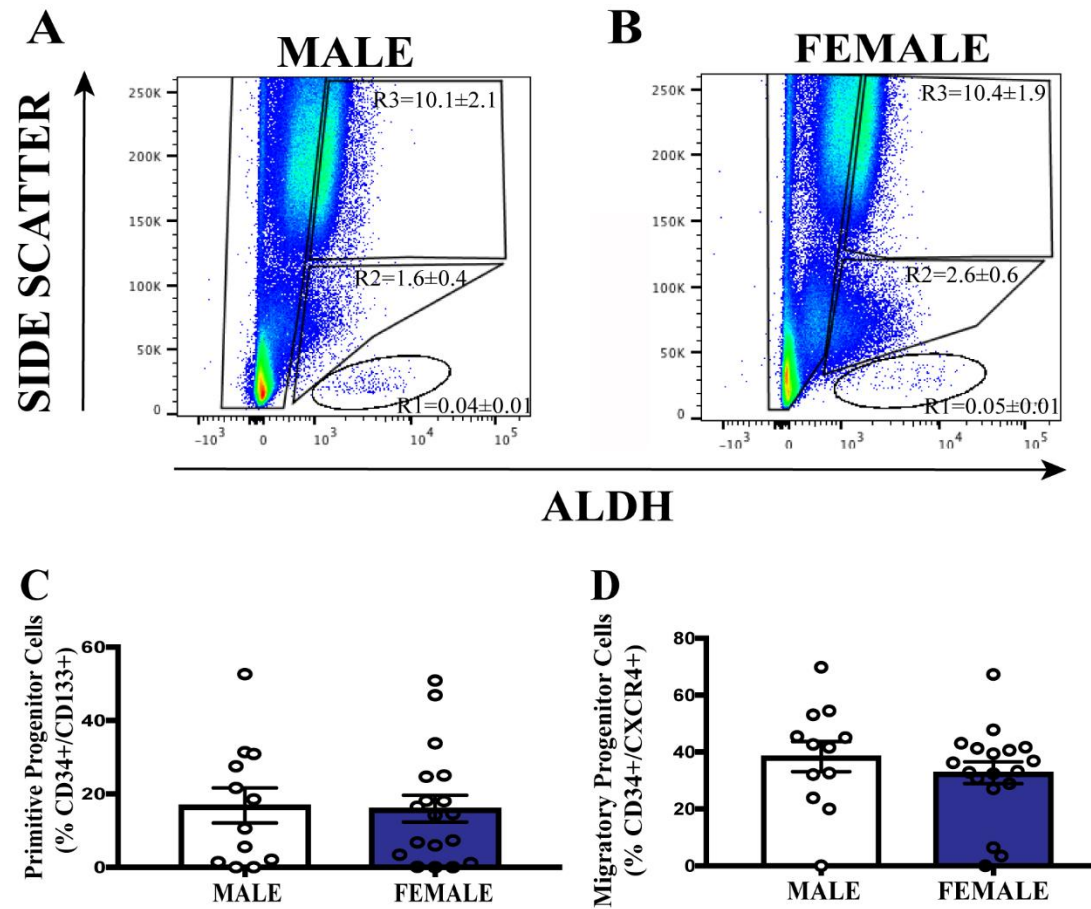

**Supplemental Figure 2: Circulating ALDH<sup>hi</sup>SSC<sup>low</sup> cells were equivalent in males and females with T2D.** (A-B) Frequency of cells with high ALDH-activity was equivalent in male (N=12) and female (N=18) patients with T2D. (C-D) The frequency of primitive and migratory progenitor cells was equivalent in male and female patients with T2D.

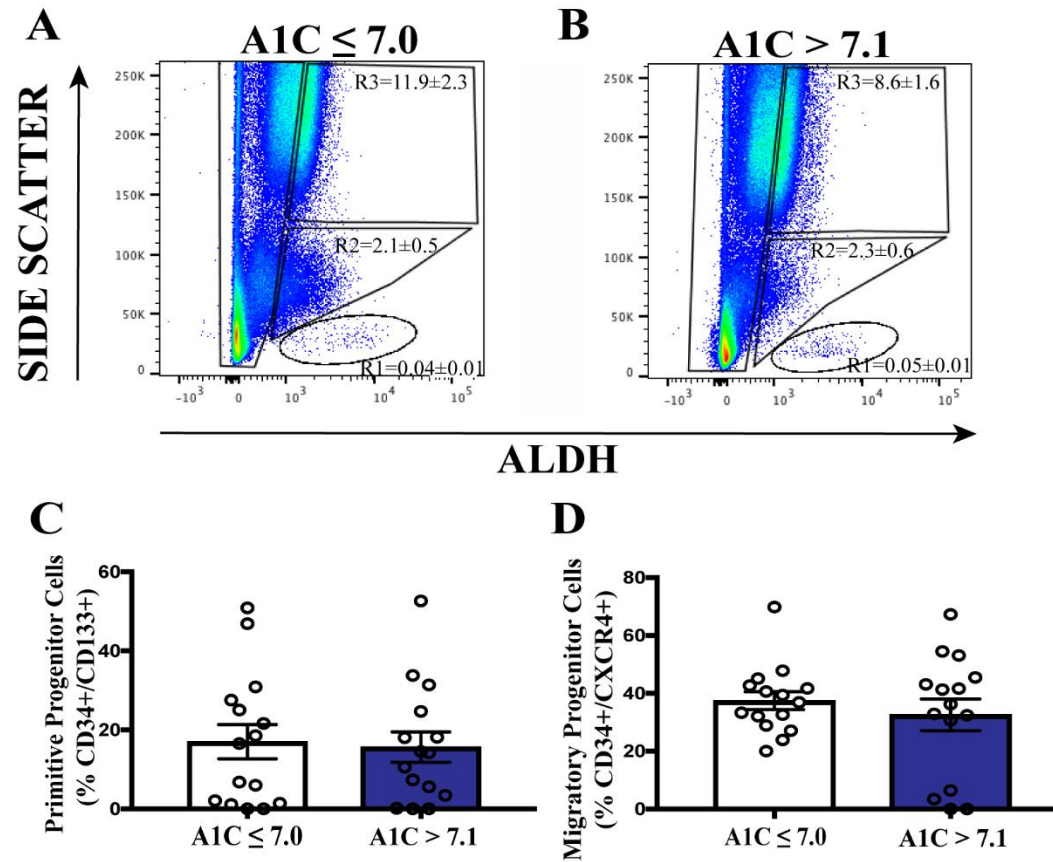

**Supplemental Figure 3: Circulating ALDH<sup>hi</sup>SSC<sup>low</sup> cells with primitive progenitor and migratory progenitor cell phenotype were equivalent despite changes in HbA1c. (A-B) Frequency of cells with high-ALDH activity was equivalent despite an increased HbA1c. (C-D) The frequency of primitive and migratory progenitor cells was equivalent in patients with an HbA1c ≤ 7 when compared to patients with an HbA1c > 7.1.**
